# Supplementary material for: Ultralow lattice thermal conductivity and excellent thermoelectric performance of monolayer CdGaInS4: a first-principles investigation
Source: Royal Society of Chemistry journal article supplement (doi:10.1039/d4cp01491j), 2024-01-01
Supplement: d4cp01491j1.pdf [file d4cp01491j1.pdf]

**Ultralow lattice thermal conductivity and excellent thermoelectric performance of monolayer CdGaInS<sub>4</sub>:  
A first-principles investigation.**

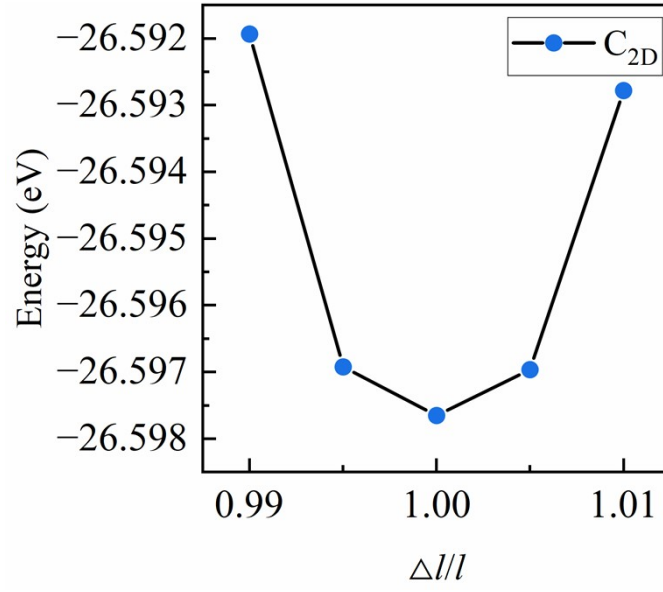

Figure. S1. The total energy as a function of strain in monolayer

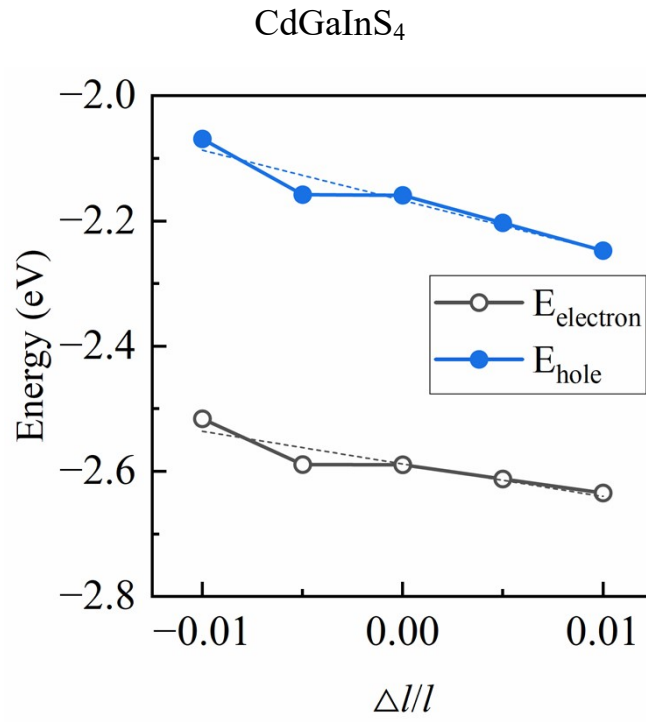

Figure. S2. The band edge energy as a function of strain in monolayer

$\text{CdGaInS}_4$

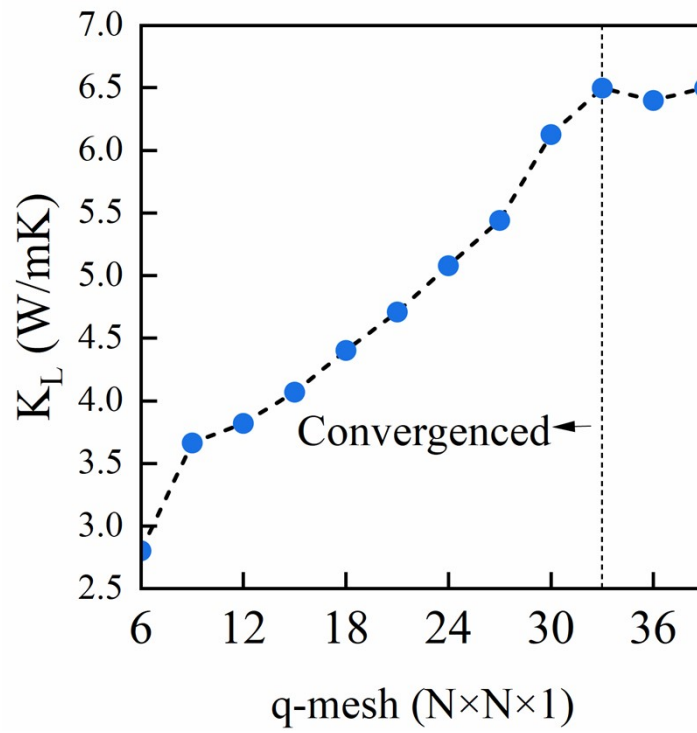

Figure. S3. Convergence test of calculated thermal conductivity for different q-mesh grid.
